# Supplementary material for: Fast Proton Exchange in Histidine: Measurement of Rate Constants through Indirect Detection by NMR Spectroscopy
Source: PubMed Central journal article supplement (PMC4497323; doi:10.1002/chem.201304992), 2014-04-09
Supplement: chem0020-6332-sd1.pdf [file chem0020-6332-sd1.pdf]

# CHEMISTRY

## A **European** Journal

### Supporting Information

© Copyright Wiley-VCH Verlag GmbH & Co. KGaA, 69451 Weinheim, 2014

#### **Fast Proton Exchange in Histidine: Measurement of Rate Constants through Indirect Detection by NMR Spectroscopy**

Akansha Ashvani Sehgal,<sup>[a, b, c]</sup> Luminita Duma,<sup>[a, b, c]</sup> Geoffrey Bodenhausen,<sup>[a, b, c, d]</sup> and Philippe Pelupessy<sup>\*[a, b, c]</sup>

chem\_201304992\_sm\_miscellaneous\_information.pdf

**Table S1.** Absolute values of one-bond scalar coupling constants for a)  $\text{NH}_3^+$ , b)  $\text{NH}^{\epsilon 2}$  and c)  $\text{NH}^{\delta 1}$ :

| <b>a) <math> ^1J(\text{NH}_3^+) </math> Hz</b>          |                |                |                |                |
|---------------------------------------------------------|----------------|----------------|----------------|----------------|
| <b>Average pH</b>                                       | <b>272.6 K</b> | <b>278.0 K</b> | <b>283.5 K</b> | <b>292.5 K</b> |
| <b>1.39</b>                                             | 73.54          | 73.64          | 74.10          | 73.79          |
| <b>2.36</b>                                             | 72.22          | 73.28          | 74.28          | 73.09          |
| <b>2.70</b>                                             | 72.84          | 73.92          | 73.37          | 73.70          |
| <b>3.17</b>                                             | 72.24          | 73.47          | 73.47          | 72.86          |
| <b>3.57</b>                                             | 73.39          | 73.47          | 73.73          | 73.02          |
| <b>3.86</b>                                             | 73.78          | 73.69          | 73.14          | 72.51          |
| <b>4.30</b>                                             | 72.67          | 72.02          | 71.49          | 72.25          |
| <b>b) <math> ^1J(\text{NH}^{\epsilon 2}) </math> Hz</b> |                |                |                |                |
| <b>1.39</b>                                             | 100.34         | 100.20         | 99.90          | 99.16          |
| <b>2.36</b>                                             | 100.25         | 100.16         | 97.99          | 97.36          |
| <b>2.70</b>                                             | 99.24          | 98.51          | 97.49          | 97.09          |
| <b>3.17</b>                                             | 98.93          | 98.34          | 98.10          | 98.11          |
| <b>3.57</b>                                             | 97.97          | 97.90          | 98.07          | 96.50          |
| <b>3.86</b>                                             | 99.51          | 99.07          | 99.42          | 99.48          |
| <b>4.30</b>                                             | 98.82          | 95.79          | 100.71         | 94.81          |
| <b>c) <math> ^1J(\text{NH}^{\delta 1}) </math> Hz</b>   |                |                |                |                |
| <b>1.39</b>                                             | 96.71          | 97.29          | 101.25         | 95.06          |
| <b>2.36</b>                                             | 93.61          | 92.27          | 93.58          | 102.39         |
| <b>2.70</b>                                             | 93.13          | 92.66          | 100.91         | 98.19          |
| <b>3.17</b>                                             | 93.31          | 96.51          | 97.80          | 91.99          |
| <b>3.57</b>                                             | 92.67          | 94.38          | 93.77          | 97.33          |
| <b>3.86</b>                                             | 98.54          | 103.49         | 100.86         | 105.40         |
| <b>4.30</b>                                             | 92.08          | 111.99         |                |                |

**Table S2.** Chemical shifts  $\delta_{\text{H}}$  of a)  $\text{NH}_3^+$  protons, b)  $\text{NH}^{\epsilon 2}$  proton and c)  $\text{NH}^{\delta 1}$  proton:

| <b>a) <math>\delta_{\text{H}}</math> (<math>\text{NH}_3^+</math>) ppm</b>          |                |                |                |                |
|------------------------------------------------------------------------------------|----------------|----------------|----------------|----------------|
| <b>Average pH</b>                                                                  | <b>272.6 K</b> | <b>278.0 K</b> | <b>283.5 K</b> | <b>292.5 K</b> |
| <b>1.39</b>                                                                        | 8.174          | 8.134          | 8.113          | 8.109          |
| <b>2.36</b>                                                                        | 8.120          | 8.113          | 8.114          | 8.075          |
| <b>2.70</b>                                                                        | 8.086          | 8.057          | 8.077          | 8.032          |
| <b>3.17</b>                                                                        | 8.052          | 8.034          | 8.027          | 8.007          |
| <b>3.57</b>                                                                        | 8.045          | 8.046          | 8.032          | 8.009          |
| <b>3.86</b>                                                                        | 8.036          | 8.033          | 8.019          | 8.021          |
| <b>4.30</b>                                                                        | 8.071          | 8.095          | 8.045          | 7.972          |
| <b>b) <math>\delta_{\text{H}}</math> (<math>\text{NH}^{\epsilon 2}</math>) ppm</b> |                |                |                |                |
| <b>1.39</b>                                                                        | 13.777         | 13.703         | 13.659         | 13.677         |
| <b>2.36</b>                                                                        | 13.793         | 13.697         | 13.608         | 13.599         |
| <b>2.70</b>                                                                        | 13.665         | 13.714         | 13.702         | 13.664         |
| <b>3.17</b>                                                                        | 13.704         | 13.768         | 13.647         | 13.628         |
| <b>3.57</b>                                                                        | 13.713         | 13.686         | 13.660         | 13.574         |
| <b>3.86</b>                                                                        | 13.712         | 13.712         | 13.662         | 13.615         |
| <b>4.30</b>                                                                        | 13.760         | 13.657         | 13.524         | 13.898         |
| <b>c) <math>\delta_{\text{H}}</math> (<math>\text{NH}^{\delta 1}</math>) ppm</b>   |                |                |                |                |
| <b>1.39</b>                                                                        | 13.974         | 13.965         | 13.907         | 13.726         |
| <b>2.36</b>                                                                        | 13.971         | 13.905         | 13.855         | 13.966         |
| <b>2.70</b>                                                                        | 13.980         | 13.930         | 13.904         | 13.914         |
| <b>3.17</b>                                                                        | 13.939         | 14.045         | 13.854         | 14.052         |
| <b>3.57</b>                                                                        | 13.955         | 14.035         | 13.961         | 13.693         |
| <b>3.86</b>                                                                        | 14.038         | 13.963         | 13.795         | 14.113         |
| <b>4.30</b>                                                                        | 13.775         | 14.257         |                |                |

**Table S3.** Exchange rate constants  $k_{ex}$  for a)  $\text{NH}_3^+$  protons, b)  $\text{NH}^{\epsilon 2}$  proton and c)  $\text{NH}^{\delta 1}$ 

proton:

| <b>a) <math>k_{ex} (\text{NH}_3^+) \text{ s}^{-1}</math></b>          |                |                |                |                |
|-----------------------------------------------------------------------|----------------|----------------|----------------|----------------|
| <b>Average pH</b>                                                     | <b>272.6 K</b> | <b>278.0 K</b> | <b>283.5 K</b> | <b>292.5 K</b> |
| <b>1.39</b>                                                           | 252.1±2.5      | 418.5±4.2      | 591.9±5.9      | 1204.9±12.1    |
| <b>2.36</b>                                                           | 223.8±2.2      | 366.7±3.7      | 542.0±5.4      | 1067.2±10.7    |
| <b>2.70</b>                                                           | 207.6±2.1      | 339.1±3.4      | 486.8±4.9      | 968.0±9.7      |
| <b>3.17</b>                                                           | 271.9±2.7      | 414.1±4.1      | 613.7±6.2      | 1257.5±12.6    |
| <b>3.57</b>                                                           | 377.1±3.8      | 575.9±5.8      | 889.5±8.9      | 1764.0±17.7    |
| <b>3.86</b>                                                           | 683.0±6.8      | 1052.0±10.6    | 1565.7±15.7    | 2921.2±29.5    |
| <b>4.30</b>                                                           | 3065.6±31.0    | 4107.9±41.8    | 5416.7±55.6    | 8397.4±88.6    |
| <b>4.88</b>                                                           | 17791.7±213.7  | 22581.6±296.7  | 27490.8±403.7  | 41970.8±939.3  |
| <b>b) <math>k_{ex} (\text{NH}^{\epsilon 2}) \text{ s}^{-1}</math></b> |                |                |                |                |
| <b>1.39</b>                                                           | 1058.6±10.6    | 1529.5±15.4    | 2235.7±22.5    | 3998.0±40.6    |
| <b>2.36</b>                                                           | 1100.2±11.0    | 1623.3±16.3    | 2353.9±23.7    | 4142.2±42.1    |
| <b>2.70</b>                                                           | 1103.1±11.0    | 1648.6±16.6    | 2427.6±24.4    | 4218.7±42.9    |
| <b>3.17</b>                                                           | 1442.4±14.5    | 2119.9±21.3    | 3071.7±31.1    | 5377.7±55.0    |
| <b>3.57</b>                                                           | 1876.7±18.9    | 2786.9±28.1    | 4025.3±40.9    | 6980.8±72.1    |
| <b>3.86</b>                                                           | 3627.1±36.8    | 5131.4±52.4    | 7080.9±73.2    | 11562.0±123.3  |
| <b>4.30</b>                                                           | 12692±136.6    | 15758±173.9    | 19474.1±227.7  | 27363.7±347.7  |
| <b>4.88</b>                                                           | 68380.8±2725.1 | 84882.9±5365.4 |                |                |
| <b>c) <math>k_{ex} (\text{NH}^{\delta 1}) \text{ s}^{-1}</math></b>   |                |                |                |                |
| <b>1.39</b>                                                           | 11656.6±117.8  | 16099.1±163.5  | 22531.8±230.5  | 36719.8±388.6  |
| <b>2.36</b>                                                           | 12761.7±129.1  | 17909.5±182.2  | 24688.3±253.3  | 40844.1±440.8  |
| <b>2.70</b>                                                           | 12961.9±131.2  | 18316.4±186.5  | 25248.3±259.3  | 41681.8±451.7  |
| <b>3.17</b>                                                           | 13639.8±138.2  | 19072.6±194.3  | 26759.1±275.6  | 43864.4±481.7  |
| <b>3.57</b>                                                           | 14812.1±150.2  | 20631.6±210.6  | 28074.7±289.9  | 46728.2±523.9  |
| <b>3.86</b>                                                           | 16895.0±208.2  | 23141.6±236.9  | 31536.2±328.2  | 49126.8±561.3  |
| <b>4.30</b>                                                           | 32657.7±340.7  | 42538.6±457.0  | 52583.1±609.0  | 80903.8±1485.1 |
